# Supplementary material for: Molecular Epidemiology of SARS-CoV-2 in Diverse Environmental Samples Globally
Source: MDPI journal article supplement (doi:10.3390/microorganisms9081696), 2021-08-10
Supplement: s1 [file s1]

We gratefully acknowledge the following Authors from the Originating laboratories responsible for obtaining the specimens, as well as the Submitting laboratories where the genome data were generated and shared via GISAID, on which this research is based.

All Submitters of data may be contacted directly via [www.gisaid.org](http://www.gisaid.org)

Authors are sorted alphabetically.

| Accession ID                                                                                                                                                                                                                                                                                                                                                                                                                                                                                                                                                                                                                                                                                                                                                                                                                                                                                                                                                                                                                                                                                                                                                                                                                                                                                                                                                                                                                                                                                                                                                                                                                                                                                                                                                                                                                                                                                                                                                                                                                                                                                                                                                                                                                                                                                                                                                                                                                                                                                                                                                                                                                                                                                                                                                                                                                                                                                                                                                                                                                                                                                                                                                                                                                                                                                                                                                                                                                                                                                                                                                                                                                                                                                                                                                                                                                                                                                                                                                                                                                                                                                                                                                                                                                                                                                                                                                                                                                                                                                                                                                                                                                                                                                                                                                                                                                                                                                                                                                                                                                                                                                                                                                                                                                                                                                                                                                                                                                                                                                                                                                                                                                                                                                                                                                                                                                                                                                                                                                                                                                                                                                                                                                                                                                                                                                                                                                                                                                                                                                                                                                                                                                                                                                                                                                                                                                                                                                                                                                                                                                                                                                                                                                                                                                                                                                                                                                                                                                                                                                                                                                                                                                                                                                                                                                                                                                                                                                                                                                                                                                                                                                                                                                                                                                                                                                                                                                                                                                                                                                                                                                                                                                                                                                                                                                                                                                                                                                                                                                                                                                                                                                                                                                                                                                                                                                                                                                                                                                                                                                                                                                                                                                                                                                                                                                                                                                                                                                                                                                                                                                                                                                                                     | Originating Laboratory                                                                           | Submitting Laboratory                                                                                                                     | Authors                                                                                                                                                                                                                                                                                                                    |
|----------------------------------------------------------------------------------------------------------------------------------------------------------------------------------------------------------------------------------------------------------------------------------------------------------------------------------------------------------------------------------------------------------------------------------------------------------------------------------------------------------------------------------------------------------------------------------------------------------------------------------------------------------------------------------------------------------------------------------------------------------------------------------------------------------------------------------------------------------------------------------------------------------------------------------------------------------------------------------------------------------------------------------------------------------------------------------------------------------------------------------------------------------------------------------------------------------------------------------------------------------------------------------------------------------------------------------------------------------------------------------------------------------------------------------------------------------------------------------------------------------------------------------------------------------------------------------------------------------------------------------------------------------------------------------------------------------------------------------------------------------------------------------------------------------------------------------------------------------------------------------------------------------------------------------------------------------------------------------------------------------------------------------------------------------------------------------------------------------------------------------------------------------------------------------------------------------------------------------------------------------------------------------------------------------------------------------------------------------------------------------------------------------------------------------------------------------------------------------------------------------------------------------------------------------------------------------------------------------------------------------------------------------------------------------------------------------------------------------------------------------------------------------------------------------------------------------------------------------------------------------------------------------------------------------------------------------------------------------------------------------------------------------------------------------------------------------------------------------------------------------------------------------------------------------------------------------------------------------------------------------------------------------------------------------------------------------------------------------------------------------------------------------------------------------------------------------------------------------------------------------------------------------------------------------------------------------------------------------------------------------------------------------------------------------------------------------------------------------------------------------------------------------------------------------------------------------------------------------------------------------------------------------------------------------------------------------------------------------------------------------------------------------------------------------------------------------------------------------------------------------------------------------------------------------------------------------------------------------------------------------------------------------------------------------------------------------------------------------------------------------------------------------------------------------------------------------------------------------------------------------------------------------------------------------------------------------------------------------------------------------------------------------------------------------------------------------------------------------------------------------------------------------------------------------------------------------------------------------------------------------------------------------------------------------------------------------------------------------------------------------------------------------------------------------------------------------------------------------------------------------------------------------------------------------------------------------------------------------------------------------------------------------------------------------------------------------------------------------------------------------------------------------------------------------------------------------------------------------------------------------------------------------------------------------------------------------------------------------------------------------------------------------------------------------------------------------------------------------------------------------------------------------------------------------------------------------------------------------------------------------------------------------------------------------------------------------------------------------------------------------------------------------------------------------------------------------------------------------------------------------------------------------------------------------------------------------------------------------------------------------------------------------------------------------------------------------------------------------------------------------------------------------------------------------------------------------------------------------------------------------------------------------------------------------------------------------------------------------------------------------------------------------------------------------------------------------------------------------------------------------------------------------------------------------------------------------------------------------------------------------------------------------------------------------------------------------------------------------------------------------------------------------------------------------------------------------------------------------------------------------------------------------------------------------------------------------------------------------------------------------------------------------------------------------------------------------------------------------------------------------------------------------------------------------------------------------------------------------------------------------------------------------------------------------------------------------------------------------------------------------------------------------------------------------------------------------------------------------------------------------------------------------------------------------------------------------------------------------------------------------------------------------------------------------------------------------------------------------------------------------------------------------------------------------------------------------------------------------------------------------------------------------------------------------------------------------------------------------------------------------------------------------------------------------------------------------------------------------------------------------------------------------------------------------------------------------------------------------------------------------------------------------------------------------------------------------------------------------------------------------------------------------------------------------------------------------------------------------------------------------------------------------------------------------------------------------------------------------------------------------------------------------------------------------------------------------------------------------------------------------------------------------------------------------------------------------------------------------------------------------------------------------------------------------------------------------------------------------------------------------------------------------------------------------------------------------------------------------------------------------------------------------------------------------------------------------------------------------------------------------------------------------------------------------------------------------------------------------------------------------------------------------------------------------------------------------------------------------------------------------------------------------------------------------------------------------------------------------------------------------------------------------------------------------------------------------------------------------------------------------------------------------------------------------------------------------------------------------------------------------|--------------------------------------------------------------------------------------------------|-------------------------------------------------------------------------------------------------------------------------------------------|----------------------------------------------------------------------------------------------------------------------------------------------------------------------------------------------------------------------------------------------------------------------------------------------------------------------------|
| EPI_ISL_1317742, EPI_ISL_1318094                                                                                                                                                                                                                                                                                                                                                                                                                                                                                                                                                                                                                                                                                                                                                                                                                                                                                                                                                                                                                                                                                                                                                                                                                                                                                                                                                                                                                                                                                                                                                                                                                                                                                                                                                                                                                                                                                                                                                                                                                                                                                                                                                                                                                                                                                                                                                                                                                                                                                                                                                                                                                                                                                                                                                                                                                                                                                                                                                                                                                                                                                                                                                                                                                                                                                                                                                                                                                                                                                                                                                                                                                                                                                                                                                                                                                                                                                                                                                                                                                                                                                                                                                                                                                                                                                                                                                                                                                                                                                                                                                                                                                                                                                                                                                                                                                                                                                                                                                                                                                                                                                                                                                                                                                                                                                                                                                                                                                                                                                                                                                                                                                                                                                                                                                                                                                                                                                                                                                                                                                                                                                                                                                                                                                                                                                                                                                                                                                                                                                                                                                                                                                                                                                                                                                                                                                                                                                                                                                                                                                                                                                                                                                                                                                                                                                                                                                                                                                                                                                                                                                                                                                                                                                                                                                                                                                                                                                                                                                                                                                                                                                                                                                                                                                                                                                                                                                                                                                                                                                                                                                                                                                                                                                                                                                                                                                                                                                                                                                                                                                                                                                                                                                                                                                                                                                                                                                                                                                                                                                                                                                                                                                                                                                                                                                                                                                                                                                                                                                                                                                                                                                                 | Al Wathba Veterinary laboratory, Abu Dhabi Agriculture and Food Safety Authority (ADAFSA).       | Al Wathba Veterinary laboratory, Abu Dhabi Agriculture and Food Safety Authority (ADAFSA), Abu Dhabi, United Arab Emirates. PO Box 52150. | Abdelmalik Ibrahim Khalafalla; Hassan Zackaria Ali Ishag; Mezher Mabkhout Abdulla Al Karbi and Salama Suhail Mohammed Al Muhairi* .; Saeed Mohamed Saeed Al Yammani                                                                                                                                                        |
| EPI_ISL_1168770, EPI_ISL_1168771                                                                                                                                                                                                                                                                                                                                                                                                                                                                                                                                                                                                                                                                                                                                                                                                                                                                                                                                                                                                                                                                                                                                                                                                                                                                                                                                                                                                                                                                                                                                                                                                                                                                                                                                                                                                                                                                                                                                                                                                                                                                                                                                                                                                                                                                                                                                                                                                                                                                                                                                                                                                                                                                                                                                                                                                                                                                                                                                                                                                                                                                                                                                                                                                                                                                                                                                                                                                                                                                                                                                                                                                                                                                                                                                                                                                                                                                                                                                                                                                                                                                                                                                                                                                                                                                                                                                                                                                                                                                                                                                                                                                                                                                                                                                                                                                                                                                                                                                                                                                                                                                                                                                                                                                                                                                                                                                                                                                                                                                                                                                                                                                                                                                                                                                                                                                                                                                                                                                                                                                                                                                                                                                                                                                                                                                                                                                                                                                                                                                                                                                                                                                                                                                                                                                                                                                                                                                                                                                                                                                                                                                                                                                                                                                                                                                                                                                                                                                                                                                                                                                                                                                                                                                                                                                                                                                                                                                                                                                                                                                                                                                                                                                                                                                                                                                                                                                                                                                                                                                                                                                                                                                                                                                                                                                                                                                                                                                                                                                                                                                                                                                                                                                                                                                                                                                                                                                                                                                                                                                                                                                                                                                                                                                                                                                                                                                                                                                                                                                                                                                                                                                                                 | Beijing Center for Disease Prevention and Control                                                | Beijing Center for Disease Prevention and Control                                                                                         | Bing Lyu; Daitao Zhang; Fu Li; Lijuan Chen; Quanyi Wang; Shujuan Cui; Yang Pan; Zhaoimin Feng; Zhichao Liang                                                                                                                                                                                                               |
| EPI_ISL_437434                                                                                                                                                                                                                                                                                                                                                                                                                                                                                                                                                                                                                                                                                                                                                                                                                                                                                                                                                                                                                                                                                                                                                                                                                                                                                                                                                                                                                                                                                                                                                                                                                                                                                                                                                                                                                                                                                                                                                                                                                                                                                                                                                                                                                                                                                                                                                                                                                                                                                                                                                                                                                                                                                                                                                                                                                                                                                                                                                                                                                                                                                                                                                                                                                                                                                                                                                                                                                                                                                                                                                                                                                                                                                                                                                                                                                                                                                                                                                                                                                                                                                                                                                                                                                                                                                                                                                                                                                                                                                                                                                                                                                                                                                                                                                                                                                                                                                                                                                                                                                                                                                                                                                                                                                                                                                                                                                                                                                                                                                                                                                                                                                                                                                                                                                                                                                                                                                                                                                                                                                                                                                                                                                                                                                                                                                                                                                                                                                                                                                                                                                                                                                                                                                                                                                                                                                                                                                                                                                                                                                                                                                                                                                                                                                                                                                                                                                                                                                                                                                                                                                                                                                                                                                                                                                                                                                                                                                                                                                                                                                                                                                                                                                                                                                                                                                                                                                                                                                                                                                                                                                                                                                                                                                                                                                                                                                                                                                                                                                                                                                                                                                                                                                                                                                                                                                                                                                                                                                                                                                                                                                                                                                                                                                                                                                                                                                                                                                                                                                                                                                                                                                                                   | Bozeman Water Reclamation Facility                                                               | Wiedenheft lab, Montana State University                                                                                                  | Anna Nemudraia; Artem Nemudryi; Blake Wiedenheft; Kevin Surya; Murat Buyukyorku; Royce Wilkinson; Tanner Wiegand                                                                                                                                                                                                           |
| EPI_ISL_733568                                                                                                                                                                                                                                                                                                                                                                                                                                                                                                                                                                                                                                                                                                                                                                                                                                                                                                                                                                                                                                                                                                                                                                                                                                                                                                                                                                                                                                                                                                                                                                                                                                                                                                                                                                                                                                                                                                                                                                                                                                                                                                                                                                                                                                                                                                                                                                                                                                                                                                                                                                                                                                                                                                                                                                                                                                                                                                                                                                                                                                                                                                                                                                                                                                                                                                                                                                                                                                                                                                                                                                                                                                                                                                                                                                                                                                                                                                                                                                                                                                                                                                                                                                                                                                                                                                                                                                                                                                                                                                                                                                                                                                                                                                                                                                                                                                                                                                                                                                                                                                                                                                                                                                                                                                                                                                                                                                                                                                                                                                                                                                                                                                                                                                                                                                                                                                                                                                                                                                                                                                                                                                                                                                                                                                                                                                                                                                                                                                                                                                                                                                                                                                                                                                                                                                                                                                                                                                                                                                                                                                                                                                                                                                                                                                                                                                                                                                                                                                                                                                                                                                                                                                                                                                                                                                                                                                                                                                                                                                                                                                                                                                                                                                                                                                                                                                                                                                                                                                                                                                                                                                                                                                                                                                                                                                                                                                                                                                                                                                                                                                                                                                                                                                                                                                                                                                                                                                                                                                                                                                                                                                                                                                                                                                                                                                                                                                                                                                                                                                                                                                                                                                                   | Centre for Health Protection                                                                     | Hong Kong Department of Health                                                                                                            | Alan K.L. Tsang; Dominic N.C. Tsang; Edman T.K. Lam; Peter C.W. Yip; Rickjason C.W. Chan                                                                                                                                                                                                                                   |
| EPI_ISL_430743, EPI_ISL_430744, EPI_ISL_430745, EPI_ISL_430746                                                                                                                                                                                                                                                                                                                                                                                                                                                                                                                                                                                                                                                                                                                                                                                                                                                                                                                                                                                                                                                                                                                                                                                                                                                                                                                                                                                                                                                                                                                                                                                                                                                                                                                                                                                                                                                                                                                                                                                                                                                                                                                                                                                                                                                                                                                                                                                                                                                                                                                                                                                                                                                                                                                                                                                                                                                                                                                                                                                                                                                                                                                                                                                                                                                                                                                                                                                                                                                                                                                                                                                                                                                                                                                                                                                                                                                                                                                                                                                                                                                                                                                                                                                                                                                                                                                                                                                                                                                                                                                                                                                                                                                                                                                                                                                                                                                                                                                                                                                                                                                                                                                                                                                                                                                                                                                                                                                                                                                                                                                                                                                                                                                                                                                                                                                                                                                                                                                                                                                                                                                                                                                                                                                                                                                                                                                                                                                                                                                                                                                                                                                                                                                                                                                                                                                                                                                                                                                                                                                                                                                                                                                                                                                                                                                                                                                                                                                                                                                                                                                                                                                                                                                                                                                                                                                                                                                                                                                                                                                                                                                                                                                                                                                                                                                                                                                                                                                                                                                                                                                                                                                                                                                                                                                                                                                                                                                                                                                                                                                                                                                                                                                                                                                                                                                                                                                                                                                                                                                                                                                                                                                                                                                                                                                                                                                                                                                                                                                                                                                                                                                                   | Chinese PLA Institute for Disease Control and Prevention                                         | Chinese PLA Institute for Disease Control and Prevention                                                                                  | Lizhong Li; Peng Li; Jinhui Li                                                                                                                                                                                                                                                                                             |
| EPI_ISL_458008, EPI_ISL_458009, EPI_ISL_458010, EPI_ISL_458011, EPI_ISL_458012, EPI_ISL_458013, EPI_ISL_458014, EPI_ISL_458015                                                                                                                                                                                                                                                                                                                                                                                                                                                                                                                                                                                                                                                                                                                                                                                                                                                                                                                                                                                                                                                                                                                                                                                                                                                                                                                                                                                                                                                                                                                                                                                                                                                                                                                                                                                                                                                                                                                                                                                                                                                                                                                                                                                                                                                                                                                                                                                                                                                                                                                                                                                                                                                                                                                                                                                                                                                                                                                                                                                                                                                                                                                                                                                                                                                                                                                                                                                                                                                                                                                                                                                                                                                                                                                                                                                                                                                                                                                                                                                                                                                                                                                                                                                                                                                                                                                                                                                                                                                                                                                                                                                                                                                                                                                                                                                                                                                                                                                                                                                                                                                                                                                                                                                                                                                                                                                                                                                                                                                                                                                                                                                                                                                                                                                                                                                                                                                                                                                                                                                                                                                                                                                                                                                                                                                                                                                                                                                                                                                                                                                                                                                                                                                                                                                                                                                                                                                                                                                                                                                                                                                                                                                                                                                                                                                                                                                                                                                                                                                                                                                                                                                                                                                                                                                                                                                                                                                                                                                                                                                                                                                                                                                                                                                                                                                                                                                                                                                                                                                                                                                                                                                                                                                                                                                                                                                                                                                                                                                                                                                                                                                                                                                                                                                                                                                                                                                                                                                                                                                                                                                                                                                                                                                                                                                                                                                                                                                                                                                                                                                                   |                                                                                                  |                                                                                                                                           |                                                                                                                                                                                                                                                                                                                            |
| see above                                                                                                                                                                                                                                                                                                                                                                                                                                                                                                                                                                                                                                                                                                                                                                                                                                                                                                                                                                                                                                                                                                                                                                                                                                                                                                                                                                                                                                                                                                                                                                                                                                                                                                                                                                                                                                                                                                                                                                                                                                                                                                                                                                                                                                                                                                                                                                                                                                                                                                                                                                                                                                                                                                                                                                                                                                                                                                                                                                                                                                                                                                                                                                                                                                                                                                                                                                                                                                                                                                                                                                                                                                                                                                                                                                                                                                                                                                                                                                                                                                                                                                                                                                                                                                                                                                                                                                                                                                                                                                                                                                                                                                                                                                                                                                                                                                                                                                                                                                                                                                                                                                                                                                                                                                                                                                                                                                                                                                                                                                                                                                                                                                                                                                                                                                                                                                                                                                                                                                                                                                                                                                                                                                                                                                                                                                                                                                                                                                                                                                                                                                                                                                                                                                                                                                                                                                                                                                                                                                                                                                                                                                                                                                                                                                                                                                                                                                                                                                                                                                                                                                                                                                                                                                                                                                                                                                                                                                                                                                                                                                                                                                                                                                                                                                                                                                                                                                                                                                                                                                                                                                                                                                                                                                                                                                                                                                                                                                                                                                                                                                                                                                                                                                                                                                                                                                                                                                                                                                                                                                                                                                                                                                                                                                                                                                                                                                                                                                                                                                                                                                                                                                                        | Department of Food Safety, Nutrition and Veterinary public health, Istituto Superiore di Sanita' | Department of Food Safety, Nutrition and Veterinary public health, Istituto Superiore di Sanita'                                          | Bonadonna, L.; Bonanno Ferraro, G.; Iaconelli, M.; La Rosa, G.; Lucentini, L.; Mancini, P.; Suffredini, E.; Veneri, C.                                                                                                                                                                                                     |
| EPI_ISL_853718, EPI_ISL_853719, EPI_ISL_853720, EPI_ISL_853722, EPI_ISL_853724, EPI_ISL_853725, EPI_ISL_853726, EPI_ISL_853727, EPI_ISL_853728, EPI_ISL_853732, EPI_ISL_853739, EPI_ISL_853740, EPI_ISL_853742, EPI_ISL_853743, EPI_ISL_853744, EPI_ISL_853745, EPI_ISL_853747, EPI_ISL_853748, EPI_ISL_853750, EPI_ISL_853755, EPI_ISL_853756, EPI_ISL_853760, EPI_ISL_853761, EPI_ISL_853763, EPI_ISL_853765, EPI_ISL_853767, EPI_ISL_853783, EPI_ISL_853785, EPI_ISL_853786, EPI_ISL_853788, EPI_ISL_853792, EPI_ISL_853796, EPI_ISL_853802, EPI_ISL_853806, EPI_ISL_853814, EPI_ISL_853929, EPI_ISL_853931, EPI_ISL_853932, EPI_ISL_853933, EPI_ISL_853934, EPI_ISL_853935, EPI_ISL_853936, EPI_ISL_853937, EPI_ISL_853938, EPI_ISL_853939, EPI_ISL_853940, EPI_ISL_853941, EPI_ISL_853942, EPI_ISL_853943, EPI_ISL_853944, EPI_ISL_853945, EPI_ISL_853946, EPI_ISL_853947, EPI_ISL_853948, EPI_ISL_853949, EPI_ISL_853950, EPI_ISL_853951, EPI_ISL_853952, EPI_ISL_853953, EPI_ISL_853954, EPI_ISL_853955, EPI_ISL_853956, EPI_ISL_854220, EPI_ISL_854221, EPI_ISL_854222, EPI_ISL_854224, EPI_ISL_854225, EPI_ISL_854226, EPI_ISL_854230, EPI_ISL_854232, EPI_ISL_854234, EPI_ISL_854236, EPI_ISL_854238, EPI_ISL_854240, EPI_ISL_934631, EPI_ISL_934632, EPI_ISL_934633, EPI_ISL_934634, EPI_ISL_934635, EPI_ISL_934636, EPI_ISL_934637, EPI_ISL_934638, EPI_ISL_934639, EPI_ISL_934640, EPI_ISL_934641, EPI_ISL_934642, EPI_ISL_934643, EPI_ISL_934644, EPI_ISL_934645, EPI_ISL_934646, EPI_ISL_934647, EPI_ISL_934648, EPI_ISL_934649, EPI_ISL_1008280, EPI_ISL_1008281, EPI_ISL_1008282, EPI_ISL_1008283, EPI_ISL_1008284, EPI_ISL_1008285, EPI_ISL_1008286, EPI_ISL_1008287, EPI_ISL_1008288, EPI_ISL_1008289, EPI_ISL_1008290, EPI_ISL_1008291, EPI_ISL_1008315, EPI_ISL_1008316, EPI_ISL_1008317, EPI_ISL_1008318, EPI_ISL_1008319, EPI_ISL_1008320, EPI_ISL_1008321, EPI_ISL_1008322, EPI_ISL_1008323, EPI_ISL_1008324, EPI_ISL_1008325, EPI_ISL_1008326, EPI_ISL_1117775, EPI_ISL_1117778, EPI_ISL_1117782, EPI_ISL_1117783, EPI_ISL_1117784, EPI_ISL_1117785, EPI_ISL_1117787, EPI_ISL_1117790, EPI_ISL_1117795, EPI_ISL_1117802, EPI_ISL_1117805, EPI_ISL_1117807, EPI_ISL_1117809, EPI_ISL_1117888, EPI_ISL_1117891, EPI_ISL_1117893, EPI_ISL_1117895, EPI_ISL_1117896, EPI_ISL_1117911, EPI_ISL_1117913, EPI_ISL_1117917, EPI_ISL_1118083, EPI_ISL_1118084, EPI_ISL_1118085, EPI_ISL_1118086, EPI_ISL_1118087, EPI_ISL_1118088, EPI_ISL_1118089, EPI_ISL_1118090, EPI_ISL_1118091, EPI_ISL_1118092, EPI_ISL_1118093, EPI_ISL_1118094, EPI_ISL_1118095, EPI_ISL_1118096, EPI_ISL_1118097, EPI_ISL_1118098, EPI_ISL_1118099, EPI_ISL_1118100, EPI_ISL_1118101, EPI_ISL_1118102, EPI_ISL_1118103, EPI_ISL_1118104, EPI_ISL_1118105, EPI_ISL_1118106, EPI_ISL_1118107, EPI_ISL_1118108, EPI_ISL_1118109, EPI_ISL_1118110, EPI_ISL_1118111, EPI_ISL_1118112, EPI_ISL_1118113, EPI_ISL_1118114, EPI_ISL_1118115, EPI_ISL_1118116, EPI_ISL_1118117, EPI_ISL_1118118, EPI_ISL_1118119, EPI_ISL_1118120, EPI_ISL_1118121, EPI_ISL_1118122, EPI_ISL_1118123, EPI_ISL_1118124, EPI_ISL_1118125, EPI_ISL_1118126, EPI_ISL_1118127, EPI_ISL_1118128, EPI_ISL_1118129, EPI_ISL_1118130, EPI_ISL_1118131, EPI_ISL_1118132, EPI_ISL_1118133, EPI_ISL_1118134, EPI_ISL_1118135, EPI_ISL_1118136, EPI_ISL_1118137, EPI_ISL_1118138, EPI_ISL_1118139, EPI_ISL_1118140, EPI_ISL_1118141, EPI_ISL_1118142, EPI_ISL_1118143, EPI_ISL_1118144, EPI_ISL_1118145, EPI_ISL_1118146, EPI_ISL_1118147, EPI_ISL_1118148, EPI_ISL_1118149, EPI_ISL_1118150, EPI_ISL_1118151, EPI_ISL_1118152, EPI_ISL_1118153, EPI_ISL_1118154, EPI_ISL_1118155, EPI_ISL_1118156, EPI_ISL_1118157, EPI_ISL_1118158, EPI_ISL_1118159, EPI_ISL_1118160, EPI_ISL_1118161, EPI_ISL_1118162, EPI_ISL_1118163, EPI_ISL_1118164, EPI_ISL_1118165, EPI_ISL_1118166, EPI_ISL_1118167, EPI_ISL_1118168, EPI_ISL_1118169, EPI_ISL_1118170, EPI_ISL_1118171, EPI_ISL_1118172, EPI_ISL_1118173, EPI_ISL_1118174, EPI_ISL_1118175, EPI_ISL_1118176, EPI_ISL_1118177, EPI_ISL_1118178, EPI_ISL_1118179, EPI_ISL_1118180, EPI_ISL_1118181, EPI_ISL_1118182, EPI_ISL_1118183, EPI_ISL_1118184, EPI_ISL_1118185, EPI_ISL_1118186, EPI_ISL_1118187, EPI_ISL_1118188, EPI_ISL_1118189, EPI_ISL_1118190                                                                                                                                                                                                                                                                                                                                                                                                                                                                                                                                                                                                                                                                                                                                                                                                                                                                                                                                                                                                                                                                                                                                                                                                                                                                                                                                                                                                                                                                                                                                                                                                                                                                                                                                                                                                                                                                                                                                                                                                                                                                                                                                                                                                                                                                                                                                                                                                                                                                                                                                                                                                                                                                                                                                                                                                                                                                                                                                                                                                                                                                                                                                                                                                                                                                                                                                                                                                                                                                                                                                                                                                                                                                                                                                                                                                                                                                                                                                                                                                                                                                                                                                                                                                                                                                                                                                                                                                                                                                                                                                                                                                                                                                                                                                                                                                                                                                                                                                                                                                                                                                                                                                                                                                                                                                                                                                                                                                                                                                                                                                                                                                                                                                                                                                                                                                                                                                          |                                                                                                  |                                                                                                                                           |                                                                                                                                                                                                                                                                                                                            |
| see above                                                                                                                                                                                                                                                                                                                                                                                                                                                                                                                                                                                                                                                                                                                                                                                                                                                                                                                                                                                                                                                                                                                                                                                                                                                                                                                                                                                                                                                                                                                                                                                                                                                                                                                                                                                                                                                                                                                                                                                                                                                                                                                                                                                                                                                                                                                                                                                                                                                                                                                                                                                                                                                                                                                                                                                                                                                                                                                                                                                                                                                                                                                                                                                                                                                                                                                                                                                                                                                                                                                                                                                                                                                                                                                                                                                                                                                                                                                                                                                                                                                                                                                                                                                                                                                                                                                                                                                                                                                                                                                                                                                                                                                                                                                                                                                                                                                                                                                                                                                                                                                                                                                                                                                                                                                                                                                                                                                                                                                                                                                                                                                                                                                                                                                                                                                                                                                                                                                                                                                                                                                                                                                                                                                                                                                                                                                                                                                                                                                                                                                                                                                                                                                                                                                                                                                                                                                                                                                                                                                                                                                                                                                                                                                                                                                                                                                                                                                                                                                                                                                                                                                                                                                                                                                                                                                                                                                                                                                                                                                                                                                                                                                                                                                                                                                                                                                                                                                                                                                                                                                                                                                                                                                                                                                                                                                                                                                                                                                                                                                                                                                                                                                                                                                                                                                                                                                                                                                                                                                                                                                                                                                                                                                                                                                                                                                                                                                                                                                                                                                                                                                                                                                        | Department of Microbiology, University Innsbruck                                                 | Berghthaler laboratory, CeMM Research Center for Molecular Medicine of the Austrian Academy of Sciences                                   | Alexander Lercher; Alexandra Popa; Andreas Berghthaler; Anna Schedl; Bekir Erguner; Benedikt Agerer; Christoph Bock; Christoph Bock; Fabian Amman; Jakob-Wendelin Genger; Jan Laine; Lukas Endler; Maelle Le Moing; Martin Senekowitsch; Martin Senekowitsch; Michael Schuster; Michael Schuster; Petr Triska; Thomas Penz |
| EPI_ISL_1273074, EPI_ISL_1273075                                                                                                                                                                                                                                                                                                                                                                                                                                                                                                                                                                                                                                                                                                                                                                                                                                                                                                                                                                                                                                                                                                                                                                                                                                                                                                                                                                                                                                                                                                                                                                                                                                                                                                                                                                                                                                                                                                                                                                                                                                                                                                                                                                                                                                                                                                                                                                                                                                                                                                                                                                                                                                                                                                                                                                                                                                                                                                                                                                                                                                                                                                                                                                                                                                                                                                                                                                                                                                                                                                                                                                                                                                                                                                                                                                                                                                                                                                                                                                                                                                                                                                                                                                                                                                                                                                                                                                                                                                                                                                                                                                                                                                                                                                                                                                                                                                                                                                                                                                                                                                                                                                                                                                                                                                                                                                                                                                                                                                                                                                                                                                                                                                                                                                                                                                                                                                                                                                                                                                                                                                                                                                                                                                                                                                                                                                                                                                                                                                                                                                                                                                                                                                                                                                                                                                                                                                                                                                                                                                                                                                                                                                                                                                                                                                                                                                                                                                                                                                                                                                                                                                                                                                                                                                                                                                                                                                                                                                                                                                                                                                                                                                                                                                                                                                                                                                                                                                                                                                                                                                                                                                                                                                                                                                                                                                                                                                                                                                                                                                                                                                                                                                                                                                                                                                                                                                                                                                                                                                                                                                                                                                                                                                                                                                                                                                                                                                                                                                                                                                                                                                                                                                 | Environmental and Global Health, University of Florida                                           | Environmental and Global Health, University of Florida                                                                                    | A.T.; Bisesi; J.A. and Bisesi; J.C.; J.H.; Lednicky; Loeb; Maurelli; Rainey, A.; S.E.; Sabo-Attwood, T.                                                                                                                                                                                                                    |
| EPI_ISL_576396, EPI_ISL_583535, EPI_ISL_583536, EPI_ISL_583537, EPI_ISL_583538, EPI_ISL_583539, EPI_ISL_583540, EPI_ISL_583541, EPI_ISL_583542, EPI_ISL_583543, EPI_ISL_583544, EPI_ISL_583545, EPI_ISL_583546, EPI_ISL_583547, EPI_ISL_583548, EPI_ISL_583549, EPI_ISL_583550, EPI_ISL_583551, EPI_ISL_583552, EPI_ISL_583553, EPI_ISL_583554, EPI_ISL_583555, EPI_ISL_583556                                                                                                                                                                                                                                                                                                                                                                                                                                                                                                                                                                                                                                                                                                                                                                                                                                                                                                                                                                                                                                                                                                                                                                                                                                                                                                                                                                                                                                                                                                                                                                                                                                                                                                                                                                                                                                                                                                                                                                                                                                                                                                                                                                                                                                                                                                                                                                                                                                                                                                                                                                                                                                                                                                                                                                                                                                                                                                                                                                                                                                                                                                                                                                                                                                                                                                                                                                                                                                                                                                                                                                                                                                                                                                                                                                                                                                                                                                                                                                                                                                                                                                                                                                                                                                                                                                                                                                                                                                                                                                                                                                                                                                                                                                                                                                                                                                                                                                                                                                                                                                                                                                                                                                                                                                                                                                                                                                                                                                                                                                                                                                                                                                                                                                                                                                                                                                                                                                                                                                                                                                                                                                                                                                                                                                                                                                                                                                                                                                                                                                                                                                                                                                                                                                                                                                                                                                                                                                                                                                                                                                                                                                                                                                                                                                                                                                                                                                                                                                                                                                                                                                                                                                                                                                                                                                                                                                                                                                                                                                                                                                                                                                                                                                                                                                                                                                                                                                                                                                                                                                                                                                                                                                                                                                                                                                                                                                                                                                                                                                                                                                                                                                                                                                                                                                                                                                                                                                                                                                                                                                                                                                                                                                                                                                                                                   | Genome Centre                                                                                    | Genome Centre                                                                                                                             | A. S. M. Rubayet Ul Alam; Amina Ferdaus manami; Habiba Ibnat; Iqbal Kabir Jahid; M.Anwar Hossain; Pravas Chandra Roy; Selina Akter; Selina Akter Pravas Chandra Roy Amina Ferdaus manami Habiba Ibnat A. S. M. Rubayet Ul Alam Shireen Nigar Iqbal Kabir Jahid and M. Anwar Hossain; Shireen Nigar                         |
| EPI_ISL_804009, EPI_ISL_804010, EPI_ISL_804011, EPI_ISL_804012, EPI_ISL_804013, EPI_ISL_804014, EPI_ISL_804015                                                                                                                                                                                                                                                                                                                                                                                                                                                                                                                                                                                                                                                                                                                                                                                                                                                                                                                                                                                                                                                                                                                                                                                                                                                                                                                                                                                                                                                                                                                                                                                                                                                                                                                                                                                                                                                                                                                                                                                                                                                                                                                                                                                                                                                                                                                                                                                                                                                                                                                                                                                                                                                                                                                                                                                                                                                                                                                                                                                                                                                                                                                                                                                                                                                                                                                                                                                                                                                                                                                                                                                                                                                                                                                                                                                                                                                                                                                                                                                                                                                                                                                                                                                                                                                                                                                                                                                                                                                                                                                                                                                                                                                                                                                                                                                                                                                                                                                                                                                                                                                                                                                                                                                                                                                                                                                                                                                                                                                                                                                                                                                                                                                                                                                                                                                                                                                                                                                                                                                                                                                                                                                                                                                                                                                                                                                                                                                                                                                                                                                                                                                                                                                                                                                                                                                                                                                                                                                                                                                                                                                                                                                                                                                                                                                                                                                                                                                                                                                                                                                                                                                                                                                                                                                                                                                                                                                                                                                                                                                                                                                                                                                                                                                                                                                                                                                                                                                                                                                                                                                                                                                                                                                                                                                                                                                                                                                                                                                                                                                                                                                                                                                                                                                                                                                                                                                                                                                                                                                                                                                                                                                                                                                                                                                                                                                                                                                                                                                                                                                                                   |                                                                                                  |                                                                                                                                           |                                                                                                                                                                                                                                                                                                                            |
| see above                                                                                                                                                                                                                                                                                                                                                                                                                                                                                                                                                                                                                                                                                                                                                                                                                                                                                                                                                                                                                                                                                                                                                                                                                                                                                                                                                                                                                                                                                                                                                                                                                                                                                                                                                                                                                                                                                                                                                                                                                                                                                                                                                                                                                                                                                                                                                                                                                                                                                                                                                                                                                                                                                                                                                                                                                                                                                                                                                                                                                                                                                                                                                                                                                                                                                                                                                                                                                                                                                                                                                                                                                                                                                                                                                                                                                                                                                                                                                                                                                                                                                                                                                                                                                                                                                                                                                                                                                                                                                                                                                                                                                                                                                                                                                                                                                                                                                                                                                                                                                                                                                                                                                                                                                                                                                                                                                                                                                                                                                                                                                                                                                                                                                                                                                                                                                                                                                                                                                                                                                                                                                                                                                                                                                                                                                                                                                                                                                                                                                                                                                                                                                                                                                                                                                                                                                                                                                                                                                                                                                                                                                                                                                                                                                                                                                                                                                                                                                                                                                                                                                                                                                                                                                                                                                                                                                                                                                                                                                                                                                                                                                                                                                                                                                                                                                                                                                                                                                                                                                                                                                                                                                                                                                                                                                                                                                                                                                                                                                                                                                                                                                                                                                                                                                                                                                                                                                                                                                                                                                                                                                                                                                                                                                                                                                                                                                                                                                                                                                                                                                                                                                                                        | Grupo de Resistencia Antimicrobiana en bacterias patógenas y ambientales GRABPA                  | Facultad de Ciencias de la Vida, UNAB                                                                                                     | Claudio Meneses; César Echeverría; Dayán Sanhueza; Eduardo Castro; Jorge Olivares; Macarena Bastías; Sebastián Wolter; Waldo Díaz                                                                                                                                                                                          |
| EPI_ISL_853723, EPI_ISL_853752, EPI_ISL_853762, EPI_ISL_853787, EPI_ISL_853816, EPI_ISL_854233, EPI_ISL_934650, EPI_ISL_934651, EPI_ISL_934696, EPI_ISL_1008266, EPI_ISL_1008267, EPI_ISL_1008268, EPI_ISL_1008269, EPI_ISL_1008270, EPI_ISL_1008271, EPI_ISL_1008272, EPI_ISL_1008273, EPI_ISL_1008274, EPI_ISL_1008275, EPI_ISL_1008276, EPI_ISL_1008277, EPI_ISL_1008278, EPI_ISL_1008279, EPI_ISL_1008311, EPI_ISL_1008312, EPI_ISL_1008313, EPI_ISL_1008314, EPI_ISL_1117781, EPI_ISL_1117783, EPI_ISL_1117793, EPI_ISL_1117803, EPI_ISL_1117892, EPI_ISL_1117908, EPI_ISL_1117912, EPI_ISL_1117915, EPI_ISL_1117918, EPI_ISL_1117919, EPI_ISL_1117920, EPI_ISL_1117921, EPI_ISL_1117922, EPI_ISL_1117923, EPI_ISL_1117924, EPI_ISL_1117925, EPI_ISL_1117926, EPI_ISL_1117927, EPI_ISL_1117928, EPI_ISL_1117929, EPI_ISL_1117930, EPI_ISL_1117931, EPI_ISL_1117932, EPI_ISL_1117933, EPI_ISL_1117934, EPI_ISL_1117935, EPI_ISL_1117936, EPI_ISL_1117937, EPI_ISL_1117938, EPI_ISL_1117939, EPI_ISL_1117940, EPI_ISL_1117941, EPI_ISL_1117942, EPI_ISL_1117943, EPI_ISL_1117944, EPI_ISL_1117945, EPI_ISL_1117946, EPI_ISL_1117947, EPI_ISL_1117948, EPI_ISL_1117949, EPI_ISL_1117950, EPI_ISL_1117951, EPI_ISL_1117952, EPI_ISL_1117953, EPI_ISL_1117954, EPI_ISL_1117955, EPI_ISL_1117956, EPI_ISL_1117957, EPI_ISL_1117958, EPI_ISL_1117959, EPI_ISL_1117960, EPI_ISL_1117961, EPI_ISL_1117962, EPI_ISL_1117963, EPI_ISL_1117964, EPI_ISL_1117965, EPI_ISL_1117966, EPI_ISL_1117967, EPI_ISL_1117968, EPI_ISL_1117969, EPI_ISL_1117970, EPI_ISL_1117971, EPI_ISL_1117972, EPI_ISL_1117973, EPI_ISL_1117974, EPI_ISL_1117975, EPI_ISL_1117976, EPI_ISL_1117977, EPI_ISL_1117978, EPI_ISL_1117979, EPI_ISL_1117980, EPI_ISL_1117981, EPI_ISL_1117982, EPI_ISL_1117983, EPI_ISL_1117984, EPI_ISL_1117985, EPI_ISL_1117986, EPI_ISL_1117987, EPI_ISL_1117988, EPI_ISL_1117989, EPI_ISL_1117990, EPI_ISL_1117991, EPI_ISL_1117992, EPI_ISL_1117993, EPI_ISL_1117994, EPI_ISL_1117995, EPI_ISL_1117996, EPI_ISL_1117997, EPI_ISL_1117998, EPI_ISL_1117999, EPI_ISL_1118000, EPI_ISL_1118001, EPI_ISL_1118002, EPI_ISL_1118003, EPI_ISL_1118004, EPI_ISL_1118005, EPI_ISL_1118006, EPI_ISL_1118007, EPI_ISL_1118008, EPI_ISL_1118009, EPI_ISL_1118010, EPI_ISL_1118011, EPI_ISL_1118012, EPI_ISL_1118013, EPI_ISL_1118014, EPI_ISL_1118015, EPI_ISL_1118016, EPI_ISL_1118017, EPI_ISL_1118018, EPI_ISL_1118019, EPI_ISL_1118020, EPI_ISL_1118021, EPI_ISL_1118022, EPI_ISL_1118023, EPI_ISL_1118024, EPI_ISL_1118025, EPI_ISL_1118026, EPI_ISL_1118027, EPI_ISL_1118028, EPI_ISL_1118029, EPI_ISL_1118030, EPI_ISL_1118031, EPI_ISL_1118032, EPI_ISL_1118033, EPI_ISL_1118034, EPI_ISL_1118035, EPI_ISL_1118036, EPI_ISL_1118037, EPI_ISL_1118038, EPI_ISL_1118039, EPI_ISL_1118040, EPI_ISL_1118041, EPI_ISL_1118042, EPI_ISL_1118043, EPI_ISL_1118044, EPI_ISL_1118045, EPI_ISL_1118046, EPI_ISL_1118047, EPI_ISL_1118048, EPI_ISL_1118049, EPI_ISL_1118050, EPI_ISL_1118051, EPI_ISL_1118052, EPI_ISL_1118053, EPI_ISL_1118054, EPI_ISL_1118055, EPI_ISL_1118056, EPI_ISL_1118057, EPI_ISL_1118058, EPI_ISL_1118059, EPI_ISL_1118060, EPI_ISL_1118061, EPI_ISL_1118062, EPI_ISL_1118063, EPI_ISL_1118064, EPI_ISL_1118065, EPI_ISL_1118066, EPI_ISL_1118067, EPI_ISL_1118068, EPI_ISL_1118069, EPI_ISL_1118070, EPI_ISL_1118071, EPI_ISL_1118072, EPI_ISL_1118073, EPI_ISL_1118074, EPI_ISL_1118075, EPI_ISL_1118076, EPI_ISL_1118077, EPI_ISL_1118078, EPI_ISL_1118079, EPI_ISL_1118080, EPI_ISL_1118081, EPI_ISL_1118082, EPI_ISL_1118083, EPI_ISL_1118084, EPI_ISL_1118085, EPI_ISL_1118086, EPI_ISL_1118087, EPI_ISL_1118088, EPI_ISL_1118089, EPI_ISL_1118090, EPI_ISL_1118091, EPI_ISL_1118092, EPI_ISL_1118093, EPI_ISL_1118094, EPI_ISL_1118095, EPI_ISL_1118096, EPI_ISL_1118097, EPI_ISL_1118098, EPI_ISL_1118099, EPI_ISL_1118100, EPI_ISL_1118101, EPI_ISL_1118102, EPI_ISL_1118103, EPI_ISL_1118104, EPI_ISL_1118105, EPI_ISL_1118106, EPI_ISL_1118107, EPI_ISL_1118108, EPI_ISL_1118109, EPI_ISL_1118110, EPI_ISL_1118111, EPI_ISL_1118112, EPI_ISL_1118113, EPI_ISL_1118114, EPI_ISL_1118115, EPI_ISL_1118116, EPI_ISL_1118117, EPI_ISL_1118118, EPI_ISL_1118119, EPI_ISL_1118120, EPI_ISL_1118121, EPI_ISL_1118122, EPI_ISL_1118123, EPI_ISL_1118124, EPI_ISL_1118125, EPI_ISL_1118126, EPI_ISL_1118127, EPI_ISL_1118128, EPI_ISL_1118129, EPI_ISL_1118130, EPI_ISL_1118131, EPI_ISL_1118132, EPI_ISL_1118133, EPI_ISL_1118134, EPI_ISL_1118135, EPI_ISL_1118136, EPI_ISL_1118137, EPI_ISL_1118138, EPI_ISL_1118139, EPI_ISL_1118140, EPI_ISL_1118141, EPI_ISL_1118142, EPI_ISL_1118143, EPI_ISL_1118144, EPI_ISL_1118145, EPI_ISL_1118146, EPI_ISL_1118147, EPI_ISL_1118148, EPI_ISL_1118149, EPI_ISL_1118150, EPI_ISL_1118151, EPI_ISL_1118152, EPI_ISL_1118153, EPI_ISL_1118154, EPI_ISL_1118155, EPI_ISL_1118156, EPI_ISL_1118157, EPI_ISL_1118158, EPI_ISL_1118159, EPI_ISL_1118160, EPI_ISL_1118161, EPI_ISL_1118162, EPI_ISL_1118163, EPI_ISL_1118164, EPI_ISL_1118165, EPI_ISL_1118166, EPI_ISL_1118167, EPI_ISL_1118168, EPI_ISL_1118169, EPI_ISL_1118170, EPI_ISL_1118171, EPI_ISL_1118172, EPI_ISL_1118173, EPI_ISL_1118174, EPI_ISL_1118175, EPI_ISL_1118176, EPI_ISL_1118177, EPI_ISL_1118178, EPI_ISL_1118179, EPI_ISL_1118180, EPI_ISL_1118181, EPI_ISL_1118182, EPI_ISL_1118183, EPI_ISL_1118184, EPI_ISL_1118185, EPI_ISL_1118186, EPI_ISL_1118187, EPI_ISL_1118188, EPI_ISL_1118189, EPI_ISL_1118190, EPI_ISL_1118191, EPI_ISL_1118192, EPI_ISL_1118193, EPI_ISL_1118194, EPI_ISL_1118195, EPI_ISL_1118196, EPI_ISL_1118197, EPI_ISL_1118198, EPI_ISL_1118199, EPI_ISL_1118200, EPI_ISL_1118201, EPI_ISL_1118202, EPI_ISL_1118203, EPI_ISL_1118204, EPI_ISL_1118205, EPI_ISL_1118206, EPI_ISL_1118207, EPI_ISL_1118208, EPI_ISL_1118209, EPI_ISL_1118210, EPI_ISL_1118211, EPI_ISL_1118212, EPI_ISL_1118213, EPI_ISL_1118214, EPI_ISL_1118215, EPI_ISL_1118216, EPI_ISL_1118217, EPI_ISL_1118218, EPI_ISL_1118219, EPI_ISL_1118220, EPI_ISL_1118221, EPI_ISL_1118222, EPI_ISL_1118223, EPI_ISL_1118224, EPI_ISL_1118225, EPI_ISL_1118226, EPI_ISL_1118227, EPI_ISL_1118228, EPI_ISL_1118229, EPI_ISL_1118230, EPI_ISL_1118231, EPI_ISL_1118232, EPI_ISL_1118233, EPI_ISL_1118234, EPI_ISL_1118235, EPI_ISL_1118236, EPI_ISL_1118237, EPI_ISL_1118238, EPI_ISL_1118239, EPI_ISL_1118240, EPI_ISL_1118241, EPI_ISL_1118242, EPI_ISL_1118243, EPI_ISL_1118244, EPI_ISL_1118245, EPI_ISL_1118246, EPI_ISL_1118247, EPI_ISL_1118248, EPI_ISL_1118249, EPI_ISL_1118250, EPI_ISL_1118251, EPI_ISL_1118252, EPI_ISL_1118253, EPI_ISL_1118254, EPI_ISL_1118255, EPI_ISL_1118256, EPI_ISL_1118257, EPI_ISL_1118258, EPI_ISL_1118259, EPI_ISL_1118260, EPI_ISL_1118261, EPI_ISL_1118262, EPI_ISL_1118263, EPI_ISL_1118264, EPI_ISL_1118265, EPI_ISL_1118266, EPI_ISL_1118267, EPI_ISL_1118268, EPI_ISL_1118269, EPI_ISL_1118270, EPI_ISL_1118271, EPI_ISL_1118272, EPI_ISL_1118273, EPI_ISL_1118274, EPI_ISL_1118275, EPI_ISL_1118276, EPI_ISL_1118277, EPI_ISL_1118278, EPI_ISL_1118279, EPI_ISL_1118280, EPI_ISL_1118281, EPI_ISL_1118282, EPI_ISL_1118283, EPI_ISL_1118284, EPI_ISL_1118285, EPI_ISL_1118286, EPI_ISL_1118287, EPI_ISL_1118288, EPI_ISL_1118289, EPI_ISL_1118290, EPI_ISL_1118291, EPI_ISL_1118292, EPI_ISL_1118293, EPI_ISL_1118294, EPI_ISL_1118295, EPI_ISL_1118296, EPI_ISL_1118297, EPI_ISL_1118298, EPI_ISL_1118299, EPI_ISL_1118300, EPI_ISL_1118301, EPI_ISL_1118302, EPI_ISL_1118303, EPI_ISL_1118304, EPI_ISL_1118305, EPI_ISL_1118306, EPI_ISL_1118307, EPI_ISL_1118308, EPI_ISL_1118309, EPI_ISL_1118310, EPI_ISL_1118311, EPI_ISL_1118312, EPI_ISL_1118313, EPI_ISL_1118314, EPI_ISL_1118315, EPI_ISL_1118316, EPI_ISL_1118317, EPI_ISL_1118318, EPI_ISL_1118319, EPI_ISL_1118320, EPI_ISL_1118321, EPI_ISL_1118322, EPI_ISL_1118323, EPI_ISL_1118324, EPI_ISL_1118325, EPI_ISL_1118326, EPI_ISL_1118327, EPI_ISL_1118328, EPI_ISL_1118329, EPI_ISL_1118330, EPI_ISL_1118331, EPI_ISL_1118332, EPI_ISL_1118333, EPI_ISL_1118334, EPI_ISL_1118335, EPI_ISL_1118336, EPI_ISL_1118337, EPI_ISL_1118338, EPI_ISL_1118339, EPI_ISL_1118340, EPI_ISL_1118341, EPI_ISL_1118342, EPI_ISL_1118343, EPI_ISL_1118344, EPI_ISL_1118345, EPI_ISL_1118346, EPI_ISL_1118347, EPI_ISL_1118348, EPI_ISL_1118349, EPI_ISL_1118350, EPI_ISL_1118351, EPI_ISL_1118352, EPI_ISL_1118353, EPI_ISL_1118354, EPI_ISL_1118355, EPI_ISL_1118356, EPI_ISL_1118357, EPI_ISL_1118358, EPI_ISL_1118359, EPI_ISL_1118360, EPI_ISL_1118361, EPI_ISL_1118362, EPI_ISL_1118363, EPI_ISL_1118364, EPI_ISL_1118365, EPI_ISL_1118366, EPI_ISL_1118367, EPI_ISL_1118368, EPI_ISL_1118369, EPI_ISL_1118370, EPI_ISL_1118371, EPI_ISL_1118372, EPI_ISL_1118373, EPI_ISL_1118374, EPI_ISL_1118375, EPI_ISL_1118376, EPI_ISL_1118377, EPI_ISL_1118378, EPI_ISL_1118379, EPI_ISL_1118380, EPI_ISL_1118381, EPI_ISL_1118382, EPI_ISL_1118383, EPI_ISL_1118384, EPI_ISL_1118385, EPI_ISL_1118386, EPI_ISL_1118387, EPI_ISL_1118388, EPI_ISL_1118389, EPI_ISL_1118390, EPI_ISL_1118391, EPI_ISL_1118392, EPI_ISL_1118393, EPI_ISL_1118394, EPI_ISL_1118395, EPI_ISL_1118396, EPI_ISL_1118397, EPI_ISL_1118398, EPI_ISL_1118399, EPI_ISL_1118400, EPI_ISL_1118401, EPI_ISL_1118402, EPI_ISL_1118403, EPI_ISL_1118404, EPI_ISL_1118405, EPI_ISL_1118406, EPI_ISL_1118407, EPI_ISL_1118408, EPI_ISL_1118409, EPI_ISL_1118410, EPI_ISL_1118411, EPI_ISL_1118412, EPI_ISL_1118413, EPI_ISL_1118414, EPI_ISL_1118415, EPI_ISL_1118416, EPI_ISL_1118417, EPI_ISL_1118418, EPI_ISL_1118419, EPI_ISL_1118420, EPI_ISL_1118421, EPI_ISL_1118422, EPI_ISL_1118423, EPI_ISL_1118424, EPI_ISL_1118425, EPI_ISL_1118426, EPI_ISL_1118427, EPI_ISL_1118428, EPI_ISL_1118429, EPI_ISL_1118430, EPI_ISL_1118431, EPI_ISL_1118432, EPI_ISL_1118433, EPI_ISL_1118434, EPI_ISL_1118435, EPI_ISL_1118436, EPI_ISL_1118437, EPI_ISL_1118438, EPI_ISL_1118439, EPI_ISL_1118440, EPI_ISL_1118441, EPI_ISL_1118442, EPI_ISL_1118443, EPI_ISL_1118444, EPI_ISL_1118445, EPI_ISL_1118446, EPI_ISL_1118447, EPI_ISL_1118448, EPI_ISL_1118449, EPI_ISL_1118450, EPI_ISL_1118451, EPI_ISL_1118452, EPI_ISL_1118453, EPI_ISL_1118454, EPI_ISL_11184 |                                                                                                  |                                                                                                                                           |                                                                                                                                                                                                                                                                                                                            |

|                                                                                                                                                                                                                                                     |                                                                                                                        |                                                                                                                                 |                                                                                                                                                                                                                                                                                                                                                                                                                                                                                                                                                                                                                                                                                                                                                                                                                                                                                                                                                                                                |
|-----------------------------------------------------------------------------------------------------------------------------------------------------------------------------------------------------------------------------------------------------|------------------------------------------------------------------------------------------------------------------------|---------------------------------------------------------------------------------------------------------------------------------|------------------------------------------------------------------------------------------------------------------------------------------------------------------------------------------------------------------------------------------------------------------------------------------------------------------------------------------------------------------------------------------------------------------------------------------------------------------------------------------------------------------------------------------------------------------------------------------------------------------------------------------------------------------------------------------------------------------------------------------------------------------------------------------------------------------------------------------------------------------------------------------------------------------------------------------------------------------------------------------------|
| EPI_ISL_447900                                                                                                                                                                                                                                      | Emerging Pathogens Institute<br>Lednický Laboratory at<br>Emerging Pathogens Institute                                 | Pathogens Institute<br>University of Florida                                                                                    | Alam; C.J.; Elbadry; Gibson; J.A.; J.C.; J.G.; Lednický; M.A. and Morris; M.M.; Stephenson                                                                                                                                                                                                                                                                                                                                                                                                                                                                                                                                                                                                                                                                                                                                                                                                                                                                                                     |
| EPI_ISL_2094412,<br>EPI_ISL_2094413,<br>EPI_ISL_2094414,<br>EPI_ISL_2094415,<br>EPI_ISL_2094416                                                                                                                                                     | Max von Pettenkofer Institute,<br>Virology, National Reference<br>Center for Retroviruses, LMU<br>Munich               | Laboratory for Functional Genome<br>Analysis; Dept. Genomics; Gene Center of<br>the LMU Munich                                  | Alexander Graf; Helmut Blum; Max Muenchhoff; Oliver Keppler; Stefan Krebs                                                                                                                                                                                                                                                                                                                                                                                                                                                                                                                                                                                                                                                                                                                                                                                                                                                                                                                      |
| EPI_ISL_1093052,<br>EPI_ISL_1093144                                                                                                                                                                                                                 | Maya Juarez, Div. of<br>Pulmonary, Critical Care and<br>Sleep Medicine, UC Davis<br>Medical Center                     | Díaz-Muñoz Lab, Department of<br>Microbiology and Molecular Genetics,<br>University of California, Davis                        | A.J. Campbell; Alexandre Tremereau-Bravard; Ana M. M. Stoian; Angela Haczk; Brandt A Robinson; Christian Sandrock; Daniel G Tompkins; David A. Coll; Greg Brennan; Ivy R. Jose; Jonathan A. Eisen; Maya Juarez; Samuel L Díaz-Muñoz; Satya Dandekar; Shefali Banerjee; Stefan Rothenburg; Stuart H. Cohen; Timothy Albertson; Tracey Goldstein                                                                                                                                                                                                                                                                                                                                                                                                                                                                                                                                                                                                                                                 |
| EPI_ISL_540430                                                                                                                                                                                                                                      | Microbial Genomics Laboratory,<br>Institut Pasteur de Montevideo,<br>Montevideo, Uruguay                               | Microbial Genomics Laboratory, Institut<br>Pasteur de Montevideo, Montevideo,<br>Uruguay                                        | Cecilia Salazar; Gonzalo Moratorio; Gregorio Iraola; Marianoel Pereira; Pilar Moreno                                                                                                                                                                                                                                                                                                                                                                                                                                                                                                                                                                                                                                                                                                                                                                                                                                                                                                           |
| EPI_ISL_429874                                                                                                                                                                                                                                      | Microbiology, Virology and<br>Biemergency Laboratory-ASST<br>FBF Sacco                                                 | Microbiology, Virology and Biemergency<br>Laboratory-ASST FBF Sacco                                                             | Rimoldi SG; Stefani F                                                                                                                                                                                                                                                                                                                                                                                                                                                                                                                                                                                                                                                                                                                                                                                                                                                                                                                                                                          |
| EPI_ISL_499042                                                                                                                                                                                                                                      | National Institute for Biological<br>Standards and Control (NIBSC)                                                     | National Institute for Biological Standards<br>and Control (NIBSC)                                                              | Dimitra Klapsa; Javier Martin; Thomas Wilton                                                                                                                                                                                                                                                                                                                                                                                                                                                                                                                                                                                                                                                                                                                                                                                                                                                                                                                                                   |
| EPI_ISL_469256, EPI_ISL_591272, EPI_ISL_591273, EPI_ISL_591274, EPI_ISL_591275, EPI_ISL_591276, EPI_ISL_591277, EPI_ISL_591278, EPI_ISL_591279, EPI_ISL_591280, EPI_ISL_2170885, EPI_ISL_2170886, EPI_ISL_2170892, EPI_ISL_2170893, EPI_ISL_2170894 | see above                                                                                                              | National Institute for Viral Disease Control<br>and Prevention, China CDC                                                       | ; 10; 4&; 7; Baoying Huang3; Cao Chen; Cao Chen3&; Chun Huang; Dayan Wang; Dayan Wang3; Dongyan Wang3; Fengqin Li6; George F. Gao; George F. Gao; George Fu Gao1; Guizhen Wu; Haibo Sun5; Hong Wang; Hong Wang3; Huilai Ma; Huilai Ma1&; Ji Wang; Ji Wang3&; Jian Cai1; Jianqun Zhang2&; Jianxing Yu1; Jingdong Song; Jun Han; Jun Meng2; Li Bai6; Li Zhao3; Liang Wang1; Lingling Mao5; Mingchun Luan2; Naiying Mao3; Ning Li6; Peihua Niu3; Qian Yang3; Ruqin Gao; Shaofeng Jiang9; Shihong Yang2; Shiwen Wang; Shuangli Zhu3; Tao Ma1; Tianjiao Ji3; Wei Yao2*; Weifeng Shi; Wenbo Xu; Wenbo Xu3*; Wenjie Tan3; Wenqing Yao5*; William J. Liu; Xiang Ren1; Xiang Zhao; Xiang Zhao3; Xiang Zhao ; Lijuan Chen; Yan Zhang3; Yang Song3&; Yanhai Wang; Yanhai Wang3; Yao Meng; Yao Meng ; Zhixiao Chen , Yuchao Wu; Yecheng Yao11; Ying Qin1&; Yingwei Sun5; Yong Zhang; Yong Zhang3; Yuchao Wu; Yunting Xia&; Zhaoguo Wang; Zhen Zhu3; Zhijian Bo2; Zhixiao Chen; Zhongjie Li1; Zijian Feng1* |
| EPI_ISL_455681                                                                                                                                                                                                                                      | National Institute of Health,<br>WHO Regional Reference<br>Laboratory for Polio<br>Eradication, Virology<br>Department | National Institute of Health, WHO<br>Regional Reference Laboratory for Polio<br>Eradication, Virology Department                | Alam; Angez, M.; Arshad, Y.; Badar, N.; Ikram, A.; Khurshid, A.; M. and Ahad, A.; Mahmood, N.; Salman, M.; Sharif, S.; Tamim, S.; Umair, M.                                                                                                                                                                                                                                                                                                                                                                                                                                                                                                                                                                                                                                                                                                                                                                                                                                                    |
| EPI_ISL_515396,<br>EPI_ISL_515398                                                                                                                                                                                                                   | Nevada State Public Health<br>Laboratory                                                                               | Nevada State Public Health Laboratory                                                                                           | Andrew Gorzalski; Chris Laverdure; Cyprian Rossetto; David Jackson; Heather Kerwin; Joel R. Sevinsky; Natalie Crawford; Paul Hartley; Richard Tillet; Stephanie Van Hooser; Subhash C. Verma; and Mark Pandori                                                                                                                                                                                                                                                                                                                                                                                                                                                                                                                                                                                                                                                                                                                                                                                 |
| EPI_ISL_2250234,<br>EPI_ISL_2250235                                                                                                                                                                                                                 | One Health Research Division,<br>Center for Molecular Dynamics<br>Nepal                                                | One Health Research Division, Center for<br>Molecular Dynamics Nepal                                                            | Manandhar; Napit, R.; P. and Karmacharya, D.                                                                                                                                                                                                                                                                                                                                                                                                                                                                                                                                                                                                                                                                                                                                                                                                                                                                                                                                                   |
| EPI_ISL_412425,<br>EPI_ISL_412426                                                                                                                                                                                                                   | Shandong Provincial Center for<br>Disease Control and Prevention                                                       | Beijing Institute of Microbiology and<br>Epidemiology                                                                           | Dian-Ming Kang; Li-Jun Duan; Lin-Yao; Mai-Juan Ma; Wen-Kui Sun; Xiang-Na Zhao; Xiao Wei; Xiao-Lin Jiang; Yang Hang; Zeng-Qiang Kou                                                                                                                                                                                                                                                                                                                                                                                                                                                                                                                                                                                                                                                                                                                                                                                                                                                             |
| EPI_ISL_1036658                                                                                                                                                                                                                                     | Tyler Radniecki                                                                                                        | Center for Genome Research and<br>Biocomputing                                                                                  | Oregon State University TRACE Project                                                                                                                                                                                                                                                                                                                                                                                                                                                                                                                                                                                                                                                                                                                                                                                                                                                                                                                                                          |
| EPI_ISL_455682                                                                                                                                                                                                                                      | University of Florida                                                                                                  | University of Florida                                                                                                           | C.-Y.; J.A.; J.G.; Lauzardo; Lednický; M. and Morris; Wu                                                                                                                                                                                                                                                                                                                                                                                                                                                                                                                                                                                                                                                                                                                                                                                                                                                                                                                                       |
| EPI_ISL_510160                                                                                                                                                                                                                                      | Utah Public Health Laboratory                                                                                          | Pathogen Discovery, Respiratory Viruses<br>Branch, Division of Viral Diseases,<br>Centers for Disease Control and<br>Prevention | Anna Uehara; Clinton R. Paden; Haibin Wang; Jing Zhang; Kerrie Franzen; Krista Queen; Mary L. Killian; Suxiang Tong; Yan Li; Ying Tao                                                                                                                                                                                                                                                                                                                                                                                                                                                                                                                                                                                                                                                                                                                                                                                                                                                          |
